# Supplementary material
Source: PubMed Central journal article supplement (PMC4399061)
Supplement: IAI.02944-14_zii999091214so1.pdf [file IAI.02944-14_zii999091214so1.pdf]

## Supplemental Figures and Table

**Figure S1.** Alignment of the sequences upstream of *cpsA* between D39 and 12 Wzy-dependent CPS types of *Streptococcus pneumoniae* covered by the 13-valent childhood vaccine.

### Supplemental Figure S1

|     |                                                                                                                                    |      |
|-----|------------------------------------------------------------------------------------------------------------------------------------|------|
| D39 | CTGTTTTCTCTTTAGCTTTAACCCAGCCATAAATGGTATTACGTGAGATTTGGAAAACGTGTGATGCTTCTGTTATACTACCTGTTGCTTCAACAATAAGAGAGAACTTTTTACGAAAACTATTGAATAT | 1168 |
| 6A  | -----TTGTCCTCTAAATACAAAAATAGCCCT-----                                                                                              | 967  |
| 6B  | -----                                                                                                                              | 853  |
| 14  | -----                                                                                                                              | 859  |
| 18C | -----                                                                                                                              | 849  |
| 7F  | CTGTTTTCTCTTTAGCTTTAACCCAGCCATAAATGGTATTACGTGAGATTTGGAAAACGTGTGATGCTTCTGTTATACTACCTGTTGCTTCAACAATAAGAGAGAACTTTTTACGAAAACTATTGAATAT | 1168 |
| 1   | CTGTTTTCTCTTTAGCTTTAACCCAGCCATAAATGGTATTACGTGAGATTTGGAAAACGTGTGATGCTTCTGTTATACTACCTGTTGCTTCAACAATAAGAGAGAACTTTTTACGAAAACTATTGAATAT | 2643 |
| 4   | CTGTTTTCTCTTTAGCTTTAACCCAGCCATAAATGGTATTACGTGAGATTTGGAAAACGTGTGATGCTTCTGTTATACTACCTGTTGCTTCAACAATAAGAGAGAACTTTTTACGAAAACTATTGAATAT | 2877 |
| 5   | -----AACCCAGAAAAAGCTTTGAGTTACGGGCGGAATTAAT-----TTTGCCATC-----                                                                      | 2057 |
| 19F | -----                                                                                                                              | 1210 |
| 9V  | TTGTTTTCTTCTCTG-----GGCTATAGCCTTTATCACAAGATATTT-----TTTCGTTTCATTATATTAGTTGGATCCTTTTCATA-----                                       | 1566 |
| 19A | TTGTTTTCTTCTCTG-----GGCTATAGCCTTTATCACAAGATATTT-----TTTCGTTTCATTATATTAGTTGGATCCTTTTCATA-----                                       | 1565 |
| 23F | TTGTTTTCTTCTCTG-----GGCTATAGCCTTTATCACAAGATATTT-----TTTCGTTTCATTATATTAGTTGGATCCTTTTCATA-----                                       | 1566 |

### RUP

|     |                                                                                                                                      |      |
|-----|--------------------------------------------------------------------------------------------------------------------------------------|------|
| D39 | GCCATAAAAAAGATTATACCACATTGTGACTATATATTATTGAACTAGAATAGTACACCTCTGCTTCTAAAAATTGTAGAAAAAGGATTAATCGTATGCTGATCAATTTGCATGTTCTTATTTTCATTTT   | 1299 |
| 6A  | -----CTAGAATAGTACACCTCTGCTTCTAAAAATTGTAGAAAAAGGATTAATCGTATGCTGATCAATTTGCATGTTCTTATTTTCATTTT                                          | 1053 |
| 6B  | -----ATTAGATTGAACTAGAATAGTACACCTCTGCTTCTAAAAATTGTAGAAAAAGGATTAATCGTATGCTGATCAATTTGCATGTTCTTATTTTCATTTT                               | 951  |
| 14  | -----CTAGAATAGTACACCTCTGCTTCTAAAAATTGTAGAAAAAGGATTAATCGTATGCTGATCAATTTGCATGTTCTTATTTTCATTTT                                          | 945  |
| 18C | -----ATTAGATTGAACTAGAATAGTACACCTCTGCTTCTAAAAATTGTAGAAAAAGGATTAATCGTATGCTGATCAATTTGCATGTTCTTATTTTCATTTT                               | 947  |
| 7F  | GCTATAAAAAAGATTATACCACATTGTGTACCAT-----ATTGAACTAGAATAGTACACCTCTGCTTCTAAAAATTGTAGAAAAAGGATTAATCGTATGCTGATCAATTTGCATGTTCTTATTTTCATTTT  | 1294 |
| 1   | GCCATAAAGAAGATTATACCACATTGTGACTATATATTATTGAACTAGAATAGTACACCTCTGCTTCTAAAAATTGTAGAAAAAGGATTAATCGTATGCTGATCAATTTGCATGTTCTTATTTTCATTTT   | 2774 |
| 4   | GCCATAAAGAAGATTATACCACATTGTGACTATATATTAGATTGAACTAGAATAGTACACCTCTGCTTCTAAAAATTGTAGAAAAAGGATTAATCGTATGCTGATCAATTTGCATGTTCTTATTTTCATTTT | 3008 |
| 5   | G-----AAGTGAACCTAGATTCCGAACAAGTCTA-----TTGAACTAGAATAGTACACCTCTGCTTCTAAAAATTGTAGAAAAAGGATTAATCGTATGCTGATCAATTTGCATGTTCTTATTTTCATTTT   | 2177 |
| 19F | -----GAACTAGAATAGTACACCTCTGCTTCTAAAAATTGTAGAAAAAGGATTAATCGTATGCTGATCAATTTGCATGTTCTTATTTTCATTTT                                       | 1300 |
| 9V  | -----TGACTATTCTACCAATGGGACATTTTCACGTTTCGATTTA                                                                                        | 1606 |
| 19A | -----TGACTATTCTACCAATGGGACATTTTCACGTTTCGATTTA                                                                                        | 1605 |
| 23F | -----TGACTATTCTACCAATGGGACATTTTCACGTTTCGATTTA                                                                                        | 1606 |

|     | RUP                                                                                                                                | Spacing sequence | -35 | -10 | <i>cpsA</i> start codon |      |
|-----|------------------------------------------------------------------------------------------------------------------------------------|------------------|-----|-----|-------------------------|------|
| D39 | ACTATATTTTTGGTTCGCGGGAAGTCTACTAAGATACTTAAAGATGCAGATAGTGAAAA--AAGGTGTAGACATTACCGTAAAAAAGTGATATAATCGTAAAGATGTTCAATGTATAGGTTGTAATCATG |                  |     |     |                         | 1426 |
| 6A  | ACTATATTTTTGGTTCGCGGGAAGTCTACTAAGATACTTAAAGATGCAGATAGTGAAAA--AAGGTGTAGACATTACCGTAAAAAAGTGATATAATCGTAAAGATGTTCAATGTATAGGTTGTAATCATG |                  |     |     |                         | 1180 |
| 6B  | ACTATATTTTTGGTTCGCGGGAAGTCTACTAAGATACTTAAAGATGCAGATAGTGAAAA--AAGGTGTAGACATTACCGTAAAAAAGTGATATAATCGTAAAGATGTTCAATGTATAGGTTGTAATCATG |                  |     |     |                         | 1078 |
| 14  | ACTATATTTTTGGTTCGCGGGAAGTCTACTAAGATACTTAAAGATGCAGATAGTGAAAA--AAA-TGTAGACATTACCGTAAAAAAGTGATATAATCGTAAAGATGTTCAATGTATAGGTTGTAATCATG |                  |     |     |                         | 1071 |
| 18C | ACTATATTTTTGGTTCGCGGGAAGTCTACTAAGATACTTAAAGATGCAGATAGTGAAAA--AAGGTGTAGACATTACCGTAAAAAAGTGATATAATCGTAAAGATGTTCAATGTATAGGTTGTAATCATG |                  |     |     |                         | 1074 |
| 7F  | ACTATATTTTTGGTTCGCGGGAAGTCTACTAAGATACTTAAAGATGCAGATAGTGAAAAAAAGGTGTAGACATTACCGTAAAAAAGTGATATAATCGTAAAGATGTTCAATGTATAGGTTGTAATCATG  |                  |     |     |                         | 1423 |
| 1   | ACTATATTTTTGGTTCGCGGGAAGTCTACTAAGATACTTAAAGATGCAGATAGTGAAAAAAAGGTGTAGACATTACCGTAAAAAAGTGATATAATCGTAAAGATGTTCAATGTATAGGTTGTAATCATG  |                  |     |     |                         | 2903 |
| 4   | ACTATATTTTTGGTTCGCGGGAAGTCTACTAAGATACTTAAAGATGCAGATAGTGAAAAAAAGGTGTAGACATTACCGTAAAAAAGTGATATAATCGTAAAGATGTTCAATGTATAGGTTGTAATCATG  |                  |     |     |                         | 3137 |
| 5   | ACTATATTTTTGGTTCGCGGGAAGTCTACTAAGATACTTAAAGATGCAGATAGTAAAA--AAAATGTAGACATTACCGTAAAAAAGTGATATAATCGTAAAGATGTTCAATGTATAGGTTGTAATCATG  |                  |     |     |                         | 2302 |
| 19F | ACTATATTTTTGGTTCGCGGGAAGTCTACTAAGATACTTAAAGATGCAGATAGTAAAA--AAAATGTAGACATTACCGTAAAAAAGTGATATAATCGTAAAGATGTTCAATGTATAGGTTGTAATCATG  |                  |     |     |                         | 1425 |
| 9V  | CTAAAGACATTATCACATTCGAATTACAC-----AAGATGCAGATAGTGAAAA--AAA-TGTAGACATTACCGTAAAAAAGTGATATAATCGTAAAGATGTTCAATGTATAGGTTGTAATCATG       |                  |     |     |                         | 1721 |
| 19A | CTAAAGACATTATCACATTCGAATTACAC-----AAGATGCAGATAGTGAAAA--AAGGTGTAGACATTACCGTAAAAAAGTGATATAATCGTAAAGATGTTCAATGTATAGGTTGTAATCATG       |                  |     |     |                         | 1721 |
| 23F | CTAAAGACATTATCACATTCGAATTACAC-----AAGATGCAGATAGTGAAAA--AAA-TGTAGACATTACCGTAAAAAAGTGATATAATCGTAAAGATGTTCAATGTATAGGTTGTAATCATG       |                  |     |     |                         | 1721 |

**Figure S2. Impact of the TIGR4 SS element on the *cps* transcription.**

**A.** Quantification of the *cps2A* mRNA in the *dexB-cps4A* swap strains of D39s by qRT-PCR

**B.** Image of a representative CPS immunoblot.

**C.** Quantitative chemiluminescence intensity levels from the immunoblotting results represented in (B).

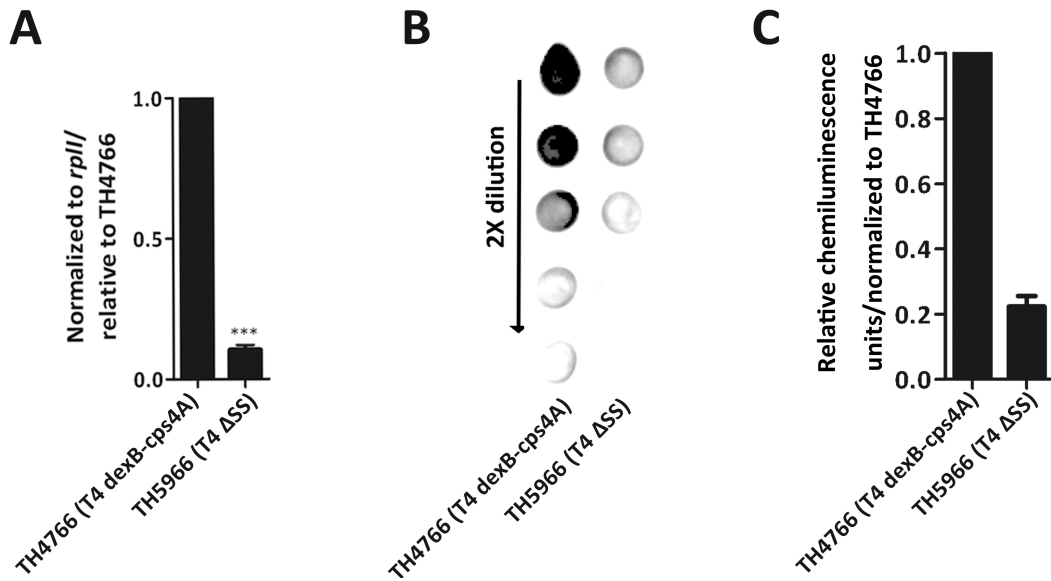

**Table S1. The primers used in this study**

| <b>Primer ID</b> | <b>Sequence (5'-3')</b>                      |
|------------------|----------------------------------------------|
| Pr74             | CATCGATACAGAGAACGAGGGAAGTAC                  |
| Pr387            | TGTTCCAGCTATTTTATTCAGA                       |
| Pr388            | TCTCTTTATCCCCTTTCCTTATGC                     |
| Pr646            | TAGTGCAGGCTGACTTTTG                          |
| Pr649            | CTGAGAAGGTGTGAATGGACGA                       |
| Pr652            | GACTTCCCGCAACCAAAATAATATAGTACACAATGTG        |
| Pr653            | CACATTGTGTACTATATTATTTGGTTCGCGGGAAGTC        |
| Pr758            | ACGATCTGTCTTGATGTTTTCTAA                     |
| Pr894            | CACGTTACAGAAAGTGAAGC                         |
| Pr895            | CTGCGATTGGTACATAGGC                          |
| Pr972            | GAGAGGATCCTATGTCTTTGACGGTAAGAAACC            |
| Pr973            | GAGACTCGAGTACTACTTATCTCACTTCTTGTGTTGTAATAATC |
| Pr1025           | 5'-GAGAGGATCCACTTCGCTTCACTTCTGTGAAC-3'       |
| Pr1026           | 5'-GAGAAAGCTTGCTTCTGTTATACTACCTGTTTCGC-3'    |
| Pr1168           | GATAGACGTCCATTCGCATATCG                      |
| Pr1169           | GTTCTGAGCCTTCGCTTCTC                         |
| Pr1170           | CTTGTGGAAACGCAAGCTAATG                       |
| Pr1171           | GTCCAAATCTGGAACGAGCC                         |
| Pr1172           | GGAAGTTATGCCAACGTTAGAAATC                    |
| Pr1173           | CCCGTAATCTCCATAAGAACCG                       |
| Pr1276           | GACCAATTTTCGTGATACGAGGAT                     |
| Pr5791           | ATAGAGCTCCTACGGGGATCTTACAATTTGGG             |
| Pr6212           | GAGAGGATCCCAAATCTGTCTTGATTGAAAACA            |
| Pr6213           | GAGACCCGGGCATTGAACATCTTACGATTATATCACT        |
| Pr6214           | GAGACCCGGGTAATTAGCTGAAGGAGGAATAATG           |
| Pr6754           | TGTATAGCTGCTTTAACTACCTTCACTTTCTGTGAACGTG     |
| Pr6755           | CACGTTACAGAAAGTGAAGGTAGTTAAAGCAGCTATACA      |
| Pr6756           | ATTTTTCGAGGATTGTCTATGTCATCTACATCAAAAACGA     |
| Pr6757           | TCGTTTTTGATGTAGATGACATAGACAATCCTCGAAAAAT     |
| Pr6758           | GGAACGAGCCCTAAAAGTGGTAATTGAAATACATCGATT      |
| Pr6759           | AAATCGATGTATTTCAATTACCACTTTTAGGGCTCGTTCC     |
| Pr6760           | TCTCCATAAGAACCGTATTTTACAAAATCCAATTTTGCCT     |

|        |                                                 |
|--------|-------------------------------------------------|
| Pr6761 | AGGCAAAATTGGATTTTGTAAAATACGGTTCTTATGGAGA        |
| Pr6850 | CACGTTACAGAAAGTGAAGCTCGAGCCGTTTGATTTTAA         |
| Pr6851 | TAAGAACCGTATTTTCTAGAGGCCCTTTTCCTTATGCTTT        |
| Pr6852 | TAAAAATCAAACGGCTCGAGCTTCACTTTCTGTGAACGTG        |
| Pr6853 | AAAGCATAAGGAAAGGGCCTCTAGAAAATACGGTTCTTA         |
| Pr6854 | TCTGCCAAAGCCTTTGCAATCTTGC                       |
| Pr7022 | TCTCCATAAGAACCGTATTTCTTCACTTTCTGTGAACGTG        |
| Pr7023 | CACGTTACAGAAAGTGAAGAAATACGGTTCTTATGGAGA         |
| Pr7177 | TCTAGTTTCAATATAATATACAAAAAGCACCTCAAAAAGGTATTACC |
| Pr7178 | CCTTTTTGAGGTGCTTTTTGTATATTATATTGAAACTAGA        |
| Pr7179 | GACTTCCCGGAACCAAAAAACAAAAAGCACCTCAAAAAGGTATTACC |
| Pr7180 | CCTTTTTGAGGTGCTTTTTGTTTTTGGTTTCGCGGGAAGTC       |
| Pr7181 | CTTTTTTACGGTAATGTCTACAAAAAGCACCTCAAAAAGGTATTACC |
| Pr7182 | CCTTTTTGAGGTGCTTTTTGTAGACATTACCGTAAAAAAG        |
| Pr7183 | ACTCATGATTAACACCTATACAAAAAGCACCTCAAAAAGGTATTACC |
| Pr7184 | CCTTTTTGAGGTGCTTTTTGTATAGGTGTTAATCATGAGT        |
| Pr7339 | TTCCTGACGAGAAGGTAGTCAATAA                       |
| Pr7344 | GTCTAGATGGACATTCCCTACTGGG                       |
| Pr7345 | AAAGCATAAGGAAAGGGCCTTATAGTAATCCACACAGA          |
| Pr7346 | TCTGTGTGGAATTACTATAAGGCCCTTTTCCTTATGCTTT        |
| Pr7347 | ACTCATGATTAACACCTATACCGTTTGATTTTAAATGGAT        |
| Pr7348 | ATCCATTA AAAATCAAACGGTATAGGTGTTAATCATGAGT       |
| Pr7705 | CGCTCAGTGTGCTGTTTTTA                            |
| Pr7706 | TCTCCCCTGCAATCAA ACTC                           |
| Pr7707 | TGATATCATGGGTGCATTGG                            |
| Pr7708 | TCCACCCTGCATGGTATTTT                            |
| Pr7709 | CGACCATCTGGACCAACTTT                            |
| Pr7710 | CTAGCCAAAGAAGCGACTGC                            |
| Pr8067 | GGTCAATGCTCAGTTAGAAAAGTG                        |
| Pr8068 | GATATGCGAATGGACGTCTATC                          |
| Pr8069 | TGGTTCATGTCATTGCAAGTG                           |
| Pr8070 | TGAAATACATCGATTTCTATCGTG                        |
| Pr8071 | GACGCAATTCCTTGTTTGG                             |
| Pr8072 | GCCTGTGAGATTTCTAACGTTG                          |
| Pr8073 | TTTAGTGACGGAGGCAGGTG                            |

|        |                                            |
|--------|--------------------------------------------|
| Pr8074 | TGGATTATGGCCAATGAAGAC                      |
| Pr8075 | AGGTCAGCGGACGAAGTG                         |
| Pr8076 | GCAGGAATCCCCTTTGAAC                        |
| Pr8077 | CGGAGAGAATGGTGCCATC                        |
| Pr8078 | AGCTCCATTATAAGTTGCCATC                     |
| Pr8079 | TTCGTGAATTTATCAGCATTCCAC                   |
| Pr8080 | GATAACTCTTATTCCACCTGTCATTCTC               |
| Pr8081 | GAGGATCGATTATTGTTGGCAC                     |
| Pr8082 | ACAGGAGTAACACCATTTCCTG                     |
| Pr8083 | GTGGTTATTATCTGTGCATTTATAGG                 |
| Pr8084 | GGGTAGCTCCCGATGATATATC                     |
| Pr8085 | GAACCAGGAGATTATATGCAGC                     |
| Pr8086 | CCAAAGTTGCTTAAAGTTAGTAATCC                 |
| Pr8087 | ATAGTTATATTCTTTATCCTATAACAAGTTGTG          |
| Pr8088 | CTGCAATGGATAGACCAACATATC                   |
| Pr8089 | CGTCAAAGCTCTATTCAAGGTATTATG                |
| Pr8090 | ATTGCTTCTCAGTATGGACCGC                     |
| Pr8091 | AATACCACGAAGAAGCTTCACAG                    |
| Pr8092 | GTAAGTGGATACAGACGGGTACC                    |
| Pr8093 | GCCTCTCAATATATTGAAACGG                     |
| Pr8094 | GGCATCAATTTTACGCACC                        |
| Pr8095 | CAAGTATGCCTTTGTGAACTACGC                   |
| Pr8096 | GATAAAGCCAGCTCCACCTGTC                     |
| Pr8097 | CTTTGAAGCTGGGCTCAAG                        |
| Pr8098 | TCCTAATTGGCCATTTGCC                        |
| Pr8105 | CCCAAATGGAAGCATAAAGAG                      |
| Pr8106 | ACTTCCCATAACAAGACTGGC                      |
| Pr8584 | GACTTCCCGCGAACCAAAAAGTACACAATGTGGTATAATC   |
| Pr8585 | GATTATACCACATTGTGTACTTTTTGGTTCGCGGGAAGTC   |
| Pr8586 | CTTTTTTACGGTAATGTCTATATAGTAAAATGAAATAAGA   |
| Pr8587 | TCTTATTTTCAATTTTACTATATAGACATTACCGTAAAAAAG |
| Pr8588 | ACTCATGATTAACACCTATACACCTTTTTTCACTATCTGC   |
| Pr8589 | GCAGATAGTGAAAAAAGGTGTATAGGTGTTAATCATGAGT   |
| Pr8590 | CTTTTTTACGGTAATGTCTAGTACACAATGTGGTATAATC   |
| Pr8591 | GATTATACCACATTGTGTACTAGACATTACCGTAAAAAAG   |

|        |                                                       |
|--------|-------------------------------------------------------|
| Pr9638 | TGCAGTGGTACCTAGGAATCTAGACATTACCGTAAAAAAGTGATAT        |
| Pr9639 | GATTCCTAGGTACCACTGCAATCTTTAAGTATCTTAGTAGACTTCCCGC     |
| Pr9641 | TGCAGTGGTACCTAGGAATCGCAGATAGTGAAAAAAGGTGTAGACATT      |
| Pr9642 | GATTCCTAGGTACCACTGCAACTTCCCGCGAACCAAAAATATAGTAA       |
| Pr9643 | GCAGTGGTACCTAGGAATCCTACTAAGATACTTAAAGATGCAGATAGT      |
| Pr9644 | GATTCCTAGGTACCACTGCTATAGTAAAATGAAATAAGAACATGACAAAT    |
| Pr9645 | GATAGTGCCTAGGAATCTAGACATTACCGTAAAAAAGTGATATAATCGTAAG  |
| Pr9646 | CGGTAATGTCTAGATTCCCTAGGCACTATCTGCATCTTTAAGTATCTTAGT   |
| Pr9647 | ACTTAAAGATTGCAGTGGTAAAAAAGGTGTAGACATTACCGTAAAAAAGTGA  |
| Pr9648 | CCTTTTTTTTACCACTGCAATCTTTAAGTATCTTAGTAGACTTCCCGCGAACC |
| Pr9649 | TTATTTTCAATTTACTATATAGACATTACCGTAAAAAAGTGATAT         |
| Pr9650 | TTTTACGGTAATGTCTATATAGTAAAATGAAATAAGAACATGAC          |
